# Supplementary material
Source: publisher figshare collection journal article supplement (https://gsajournals.figshare.com/ndownloader/files/18022745)
Supplement: Supplementary file 1 [file 18022745]

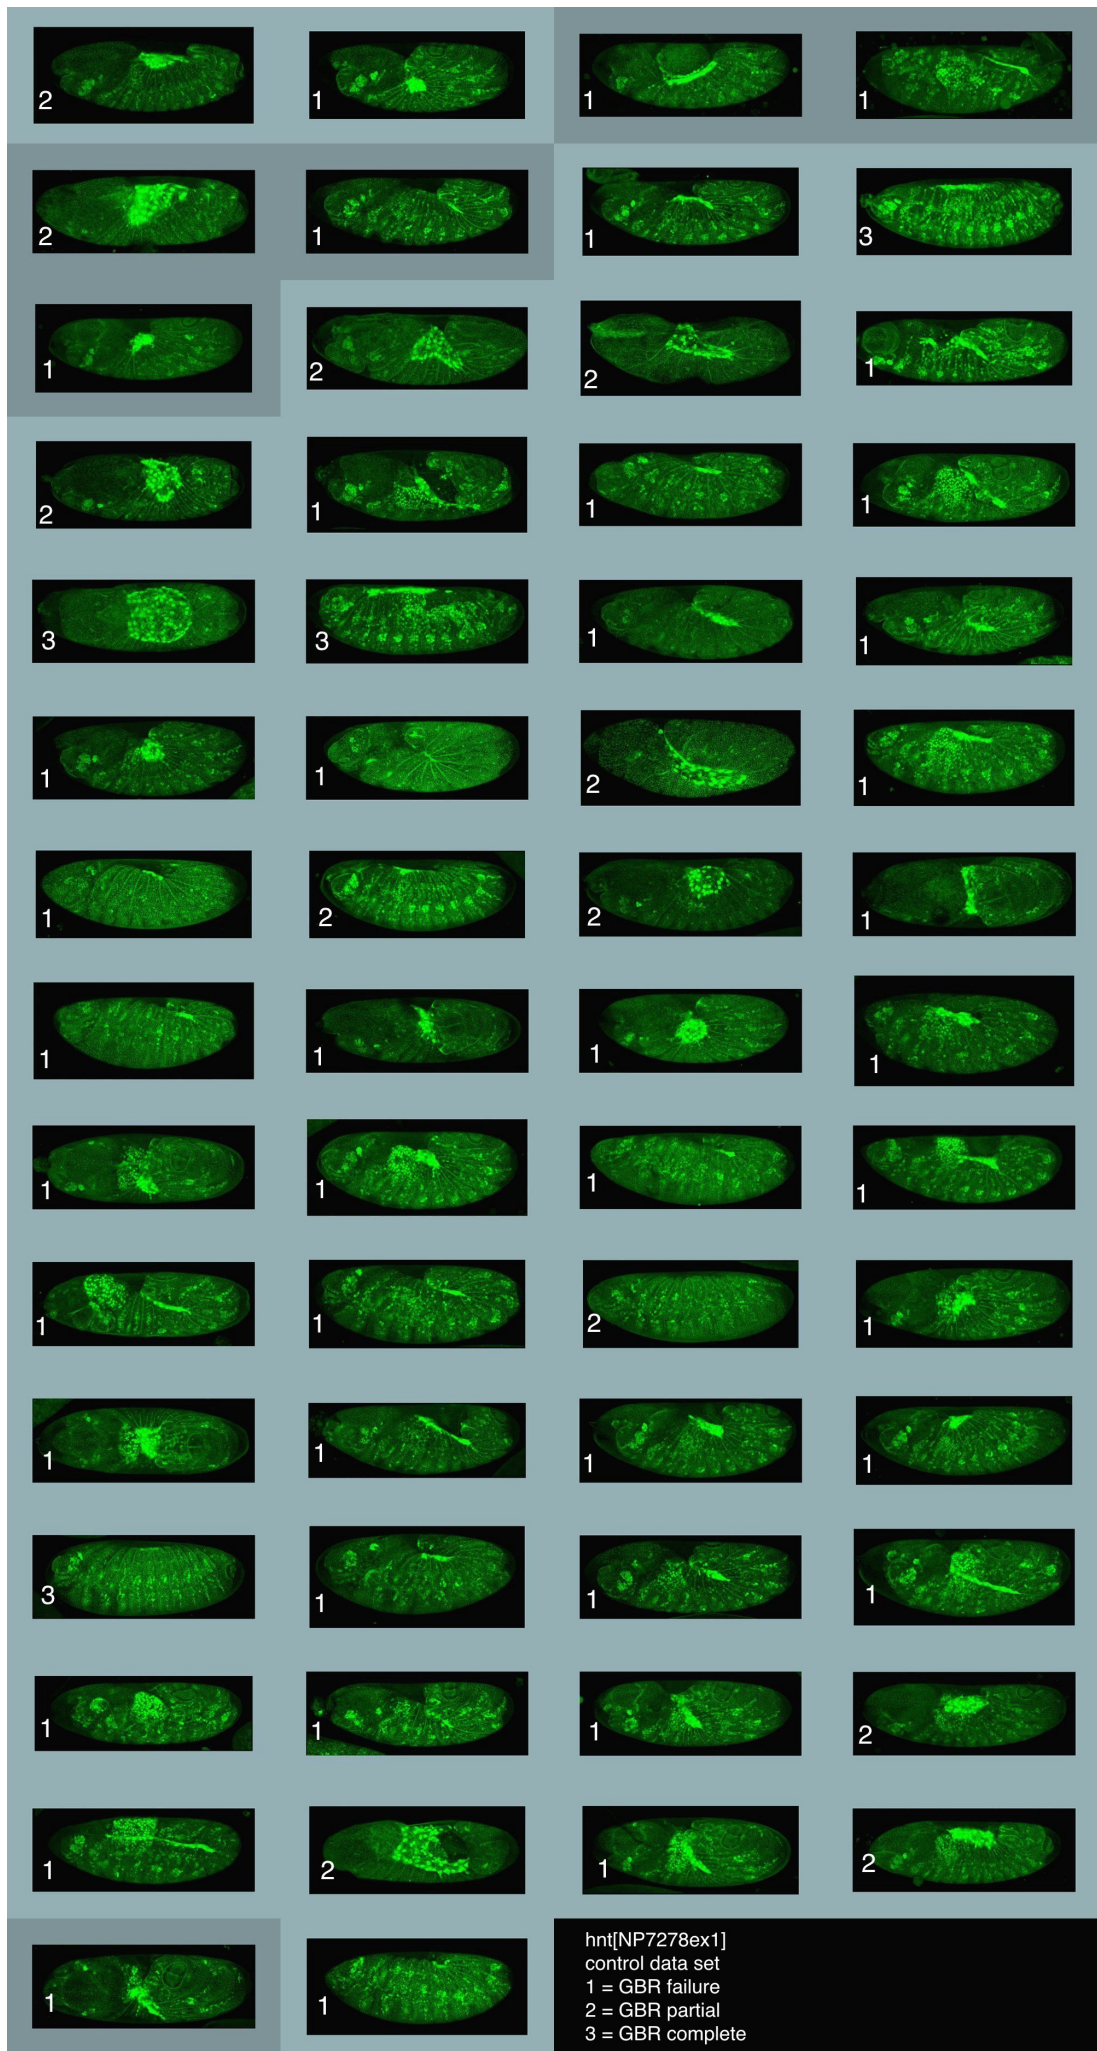

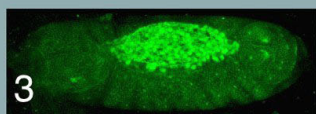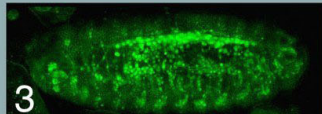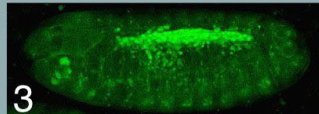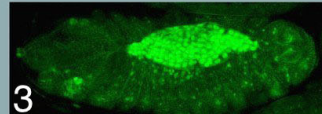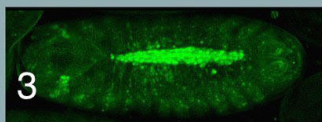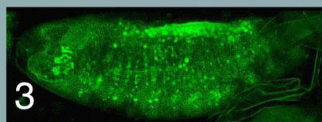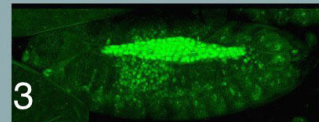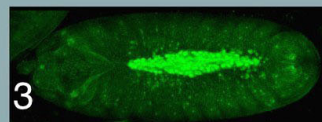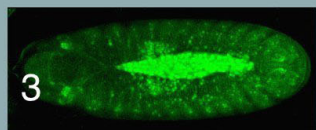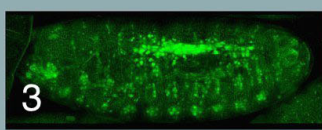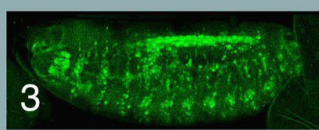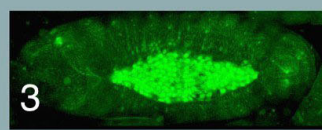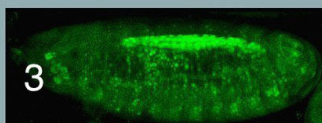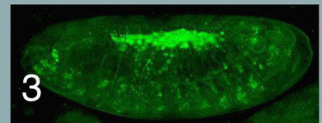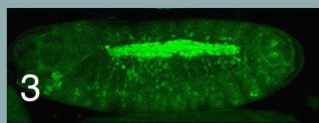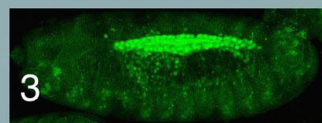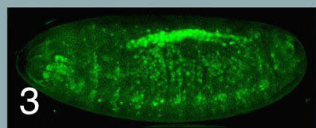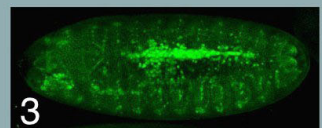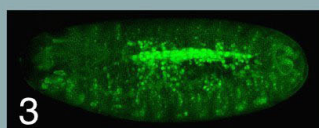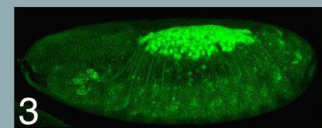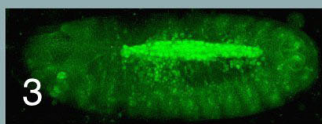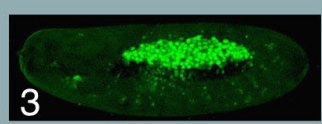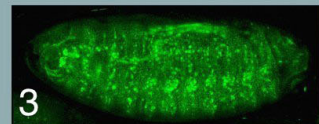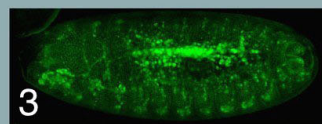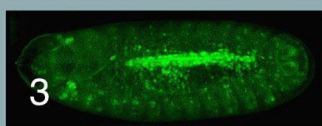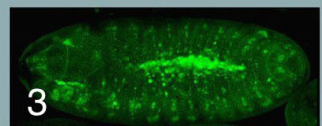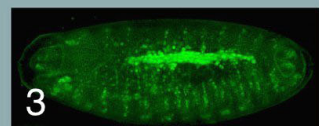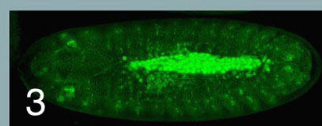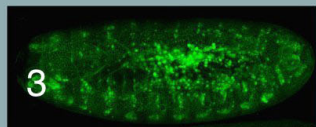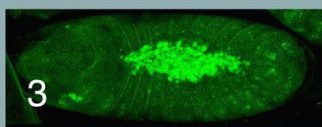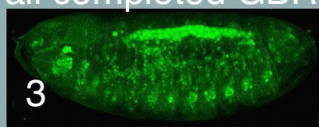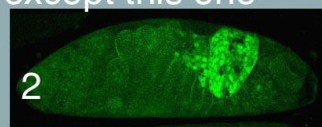

all completed GBR

except this one

hnt[NP7278ex1]/Y or /hnt[XE81] + pebBAC  
control rescue experiment  
1 = GBR failure  
2 = GBR partial  
3 = GBR complete



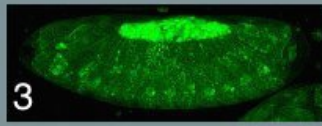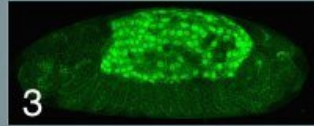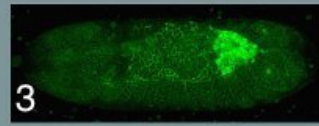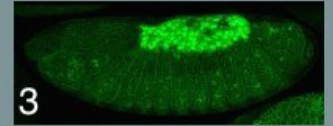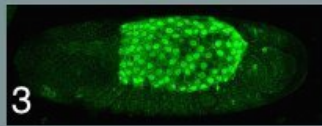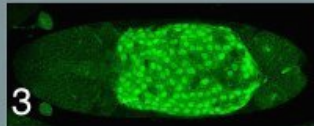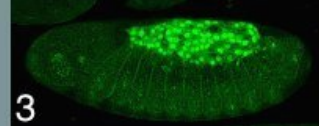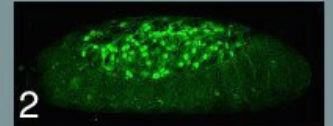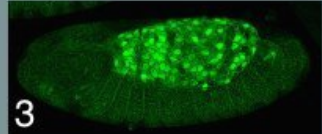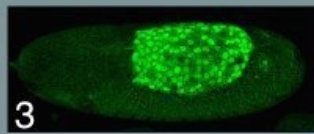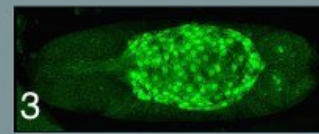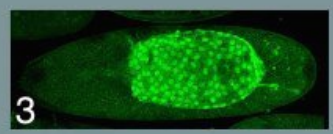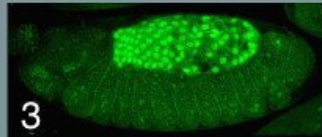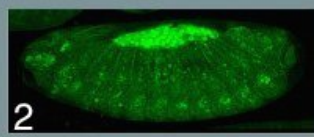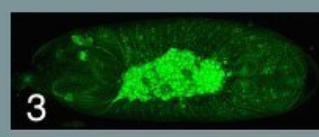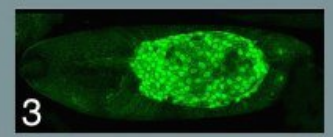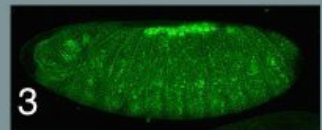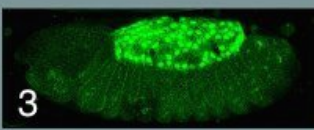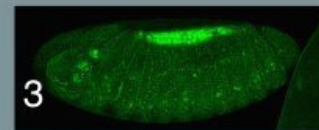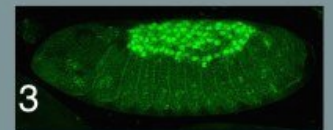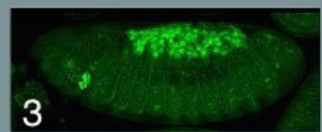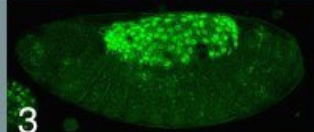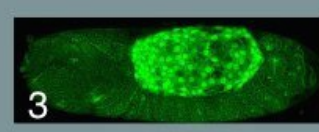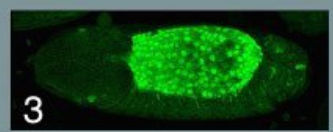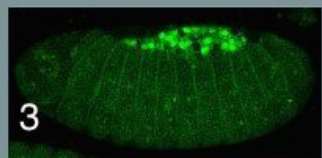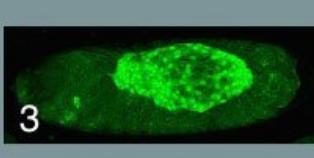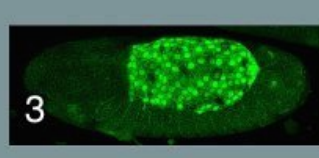

hnt[NP7278ex1] + UAS-sSpi  
rescue experiment  
1 = GBR failure  
2 = GBR partial  
3 = GBR complete

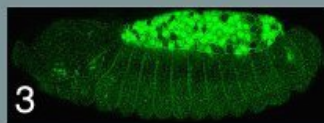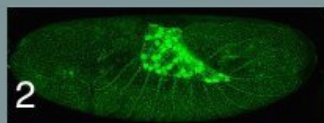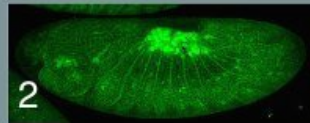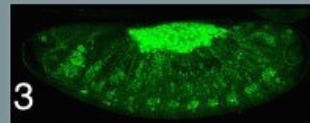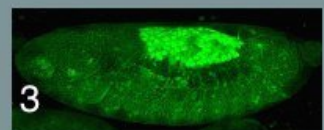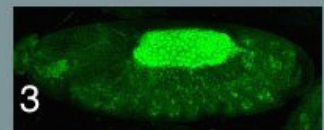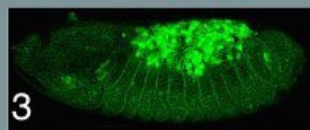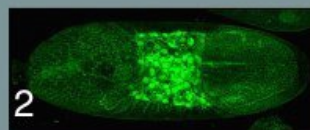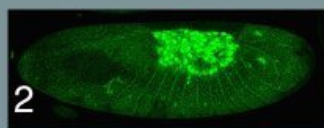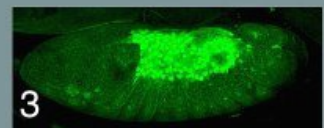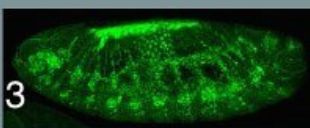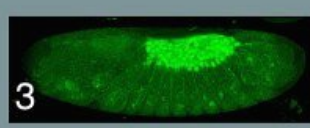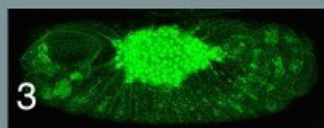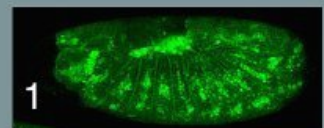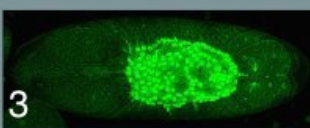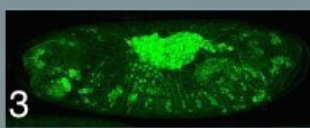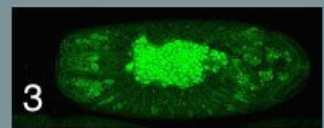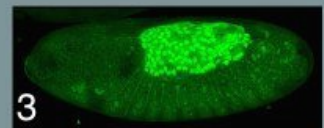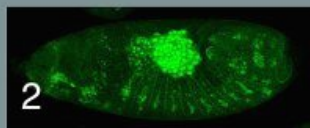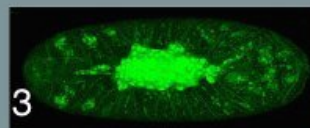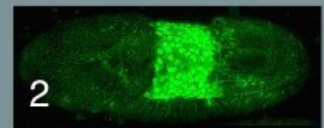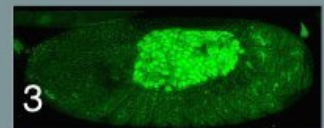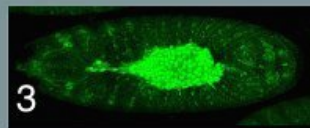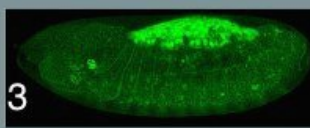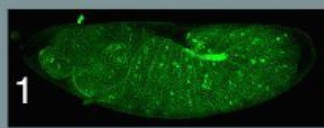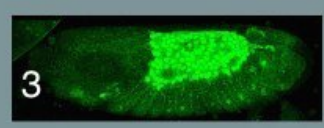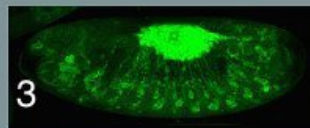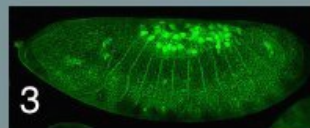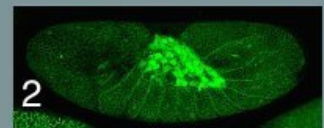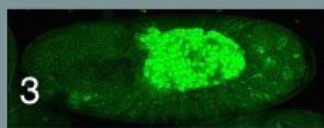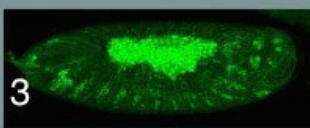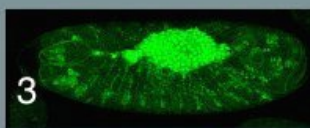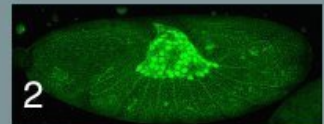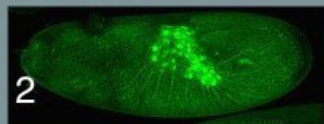

hnt[NP7278ex1] + UAS-p35  
 rescue experiment  
 1 = GBR failure  
 2 = GBR partial  
 3 = GBR complete



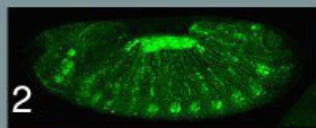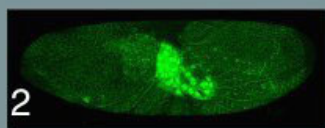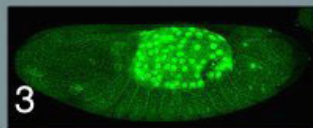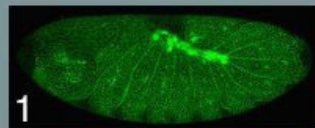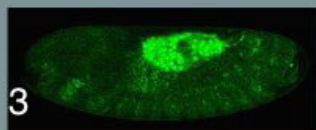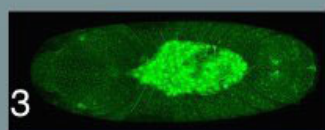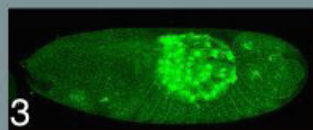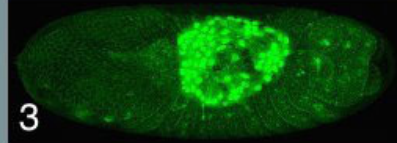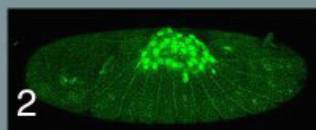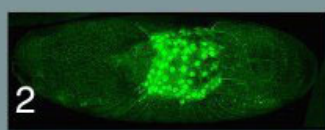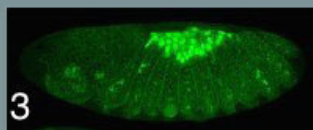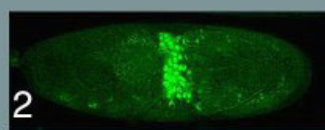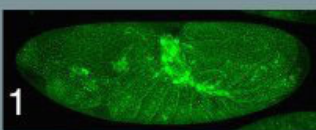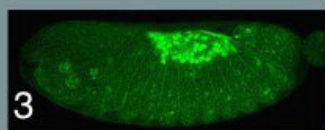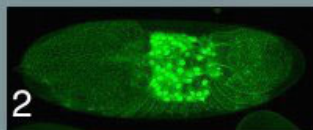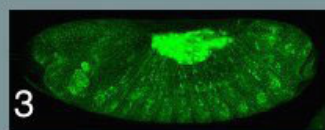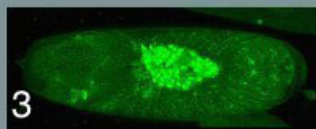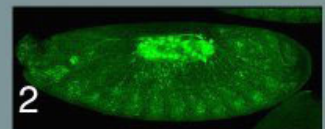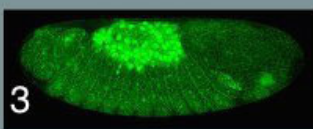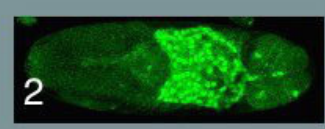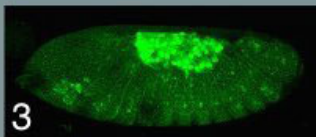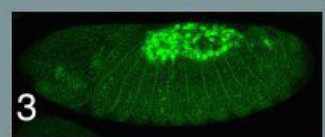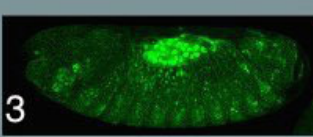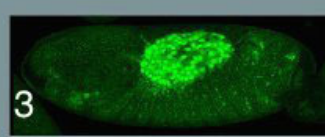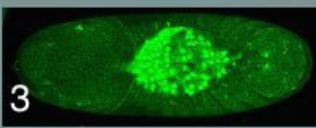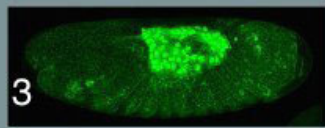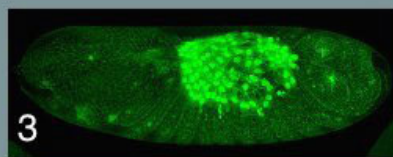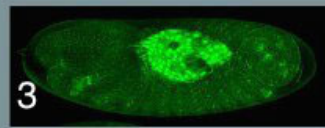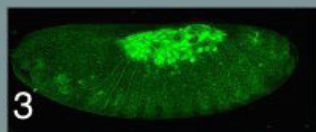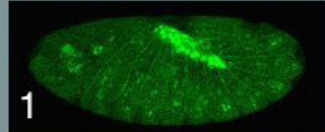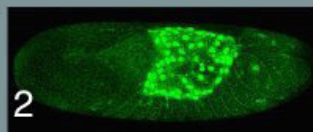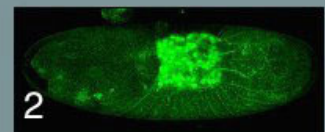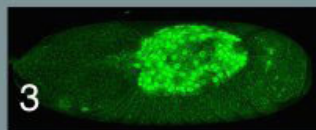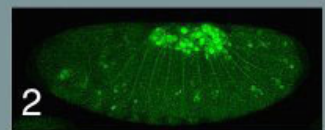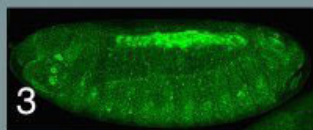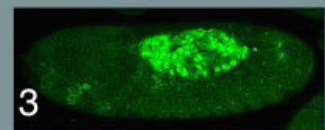

hnt[NP7278ex1] + UAS-Ras85D[V12]  
rescue experiment  
1 = GBR failure      2 = GBR partial  
3 = GBR complete

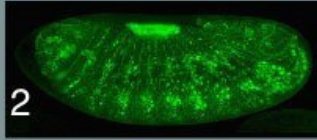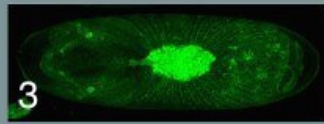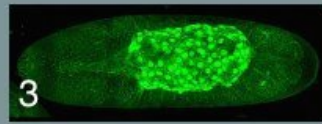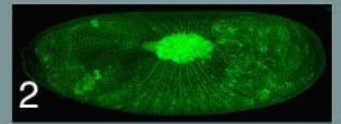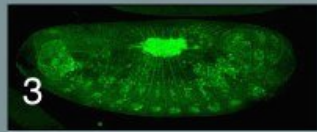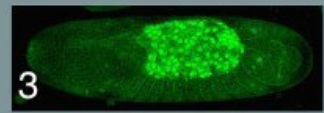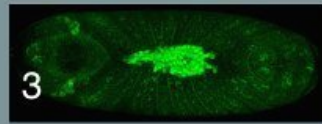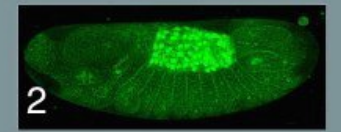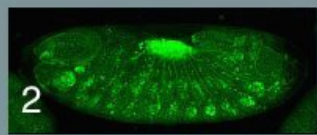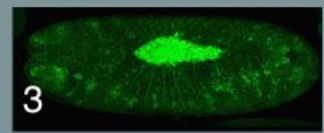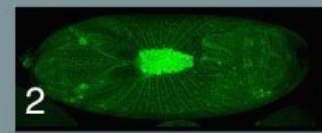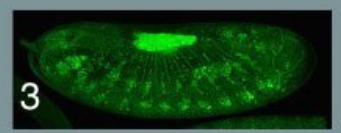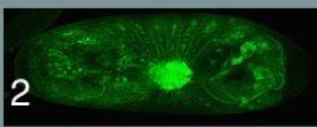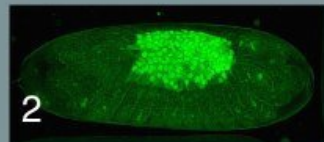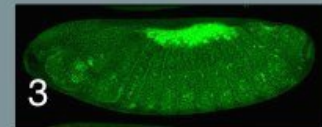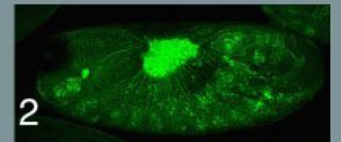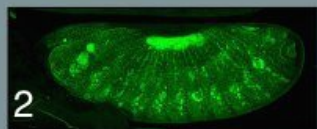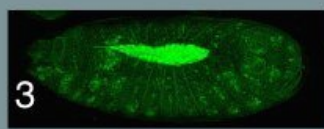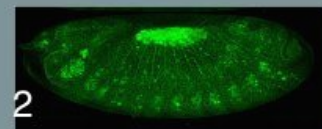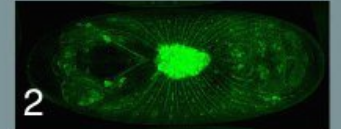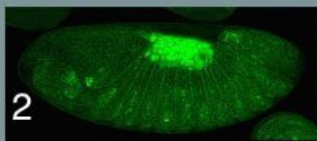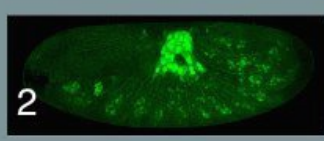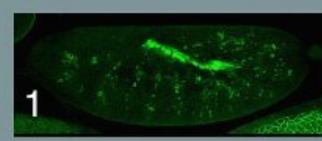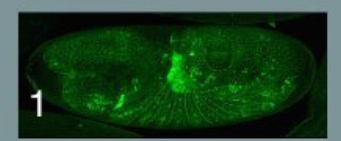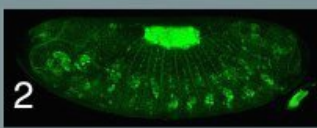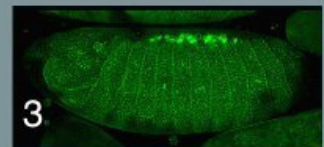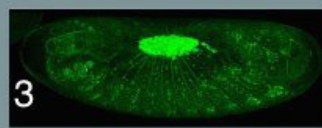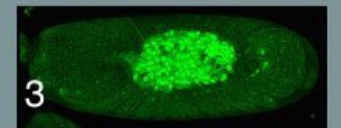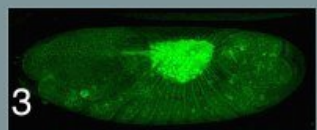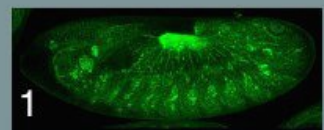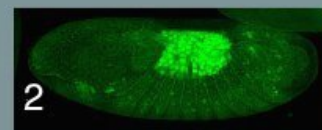

hnt[NP7278ex1]  
+ UAS-pnt[P1]  
rescue experiment  
1 = GBR failure  
2 = GBR partial  
3 = GBR complete



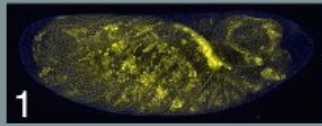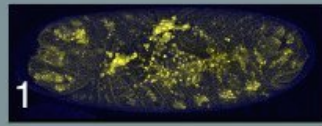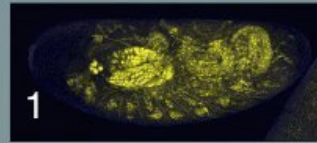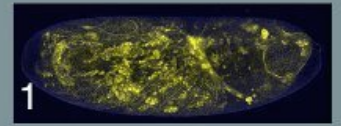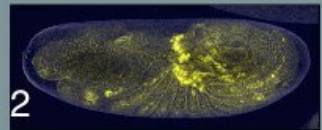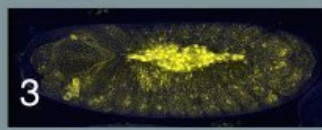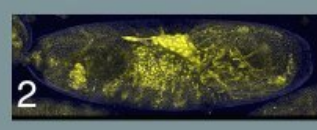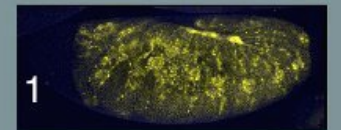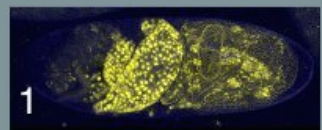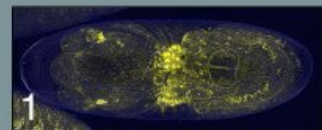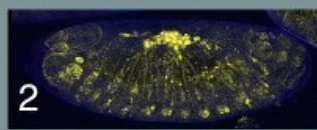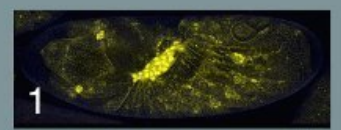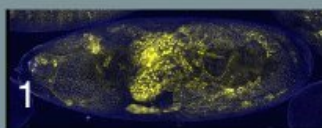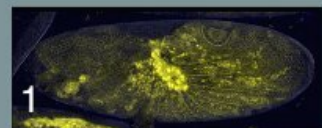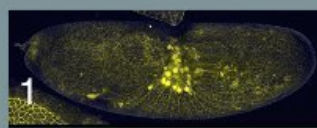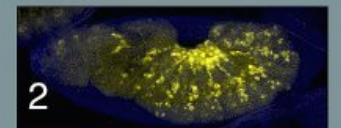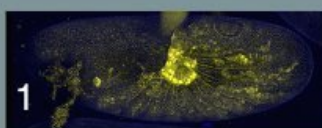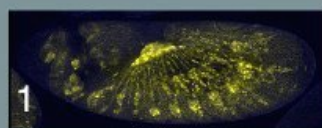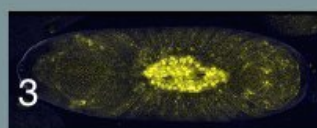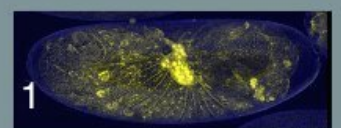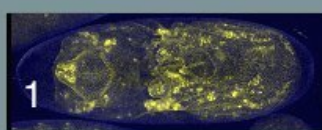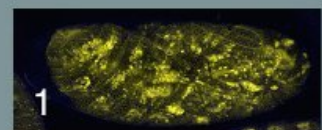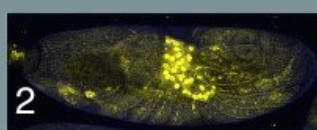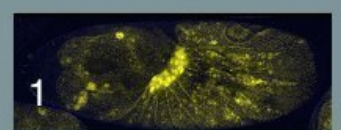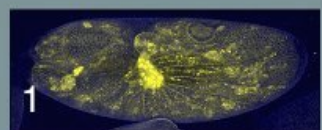

hnt[NP7278ex1] + UAS-pnt[P2]  
 rescue experiment  
 1 = GBR failure  
 2 = GBR partial    3 = GBR complete

**Figure S1. Data sets used in *hnt*<sup>NP7278ex1</sup> rescue experiment .**

The above labeled pages present all confocal images that were used to generate the stacked bar graph as presented in Figure 5K. Phenotype scores are present beside each image where 1 = GBR failure; 2 = GBR partial; and 3 = GBR complete.
